# Supplementary material for: Template-free formation of one-dimensional mesoporous ZnMn2O4 tube-in-tube nanofibers towards lithium-ion batteries as anode materials
Source: Royal Society of Chemistry journal article supplement (doi:10.1039/d1ce01056e), 2021-01-01
Supplement: d1ce01056e1.pdf [file d1ce01056e1.pdf]

## Electronic Supporting Information (ESI)

### Template-free formation of one-dimensional mesoporous ZnMn<sub>2</sub>O<sub>4</sub> tube-in-tube nanofibers towards Lithium-ion batteries as anode materials

Jingxuan Wei,<sup>†</sup> Senyang Xu,<sup>†</sup> Zhaolin Tan, Linrui Hou,\* Changzhou Yuan\*

School of Materials Science & Engineering, University of Jinan, Jinan, 250022, P.R.

China

Corresponding authors:

E-mail: mse\_houlr@ujn.edu.cn (*Prof. L.R. Hou*)

mse\_yuancz@ujn.edu.cn; ayuancz@163.com (*Prof. C.Z. Yuan*)

<sup>†</sup> These authors equally contributed to the work.

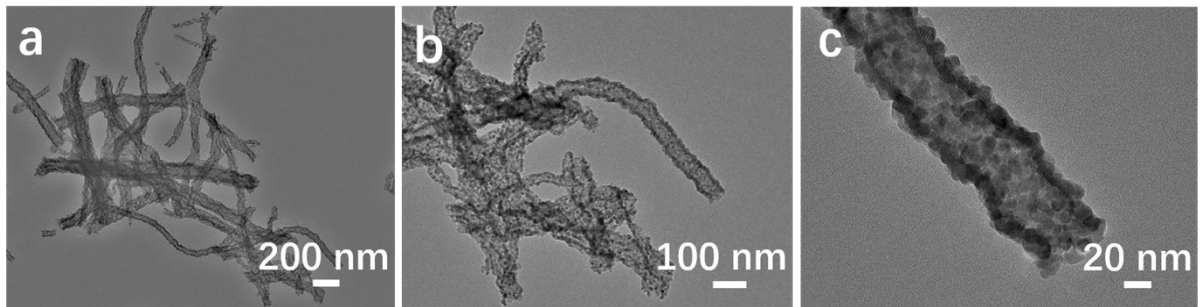

**Fig. S1** (a-c) TEM images of the ZMO NTs.

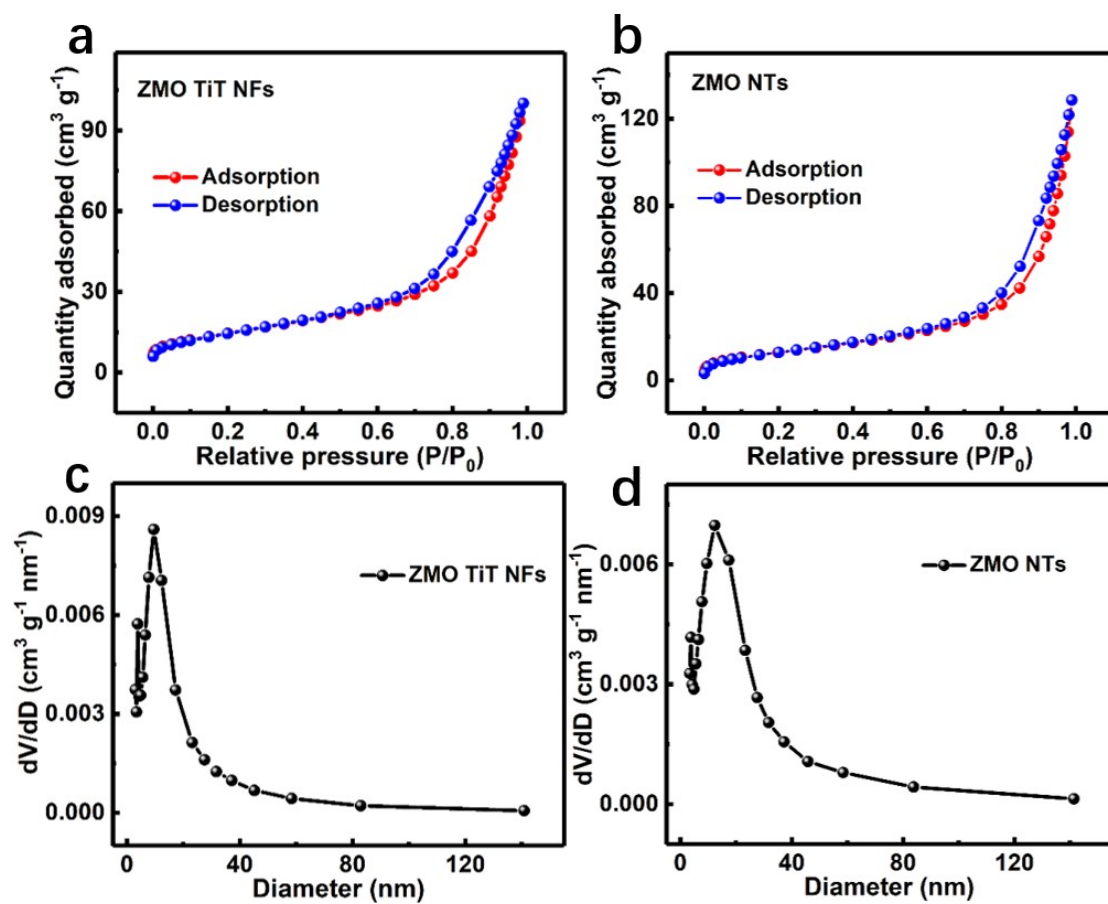

**Fig. S2** (a, b) Nitrogen adsorption/desorption isotherms and (c, d) pore-size distribution plots of (a, c) ZMO TiT NFs and (b, d) ZMO NTs.

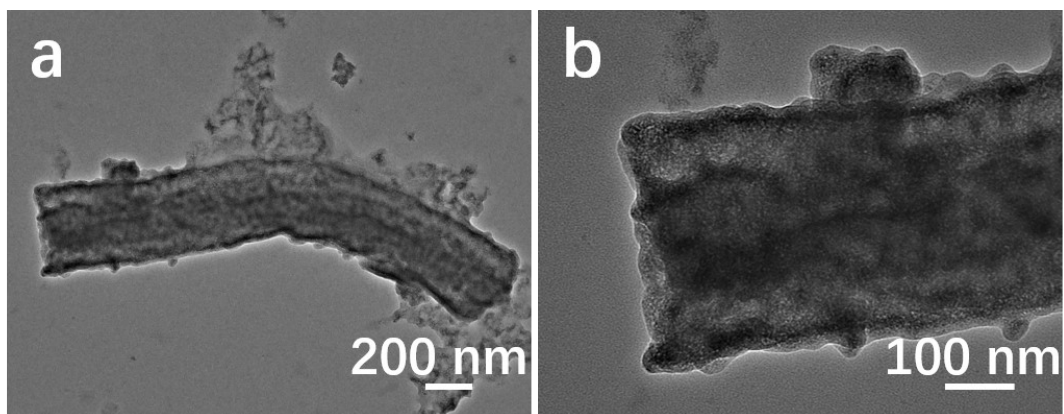

**Fig. S3** (a, b) TEM images of the ZMO TiT NFs electrode after 300 cycles at 0.5 A g<sup>-1</sup>.

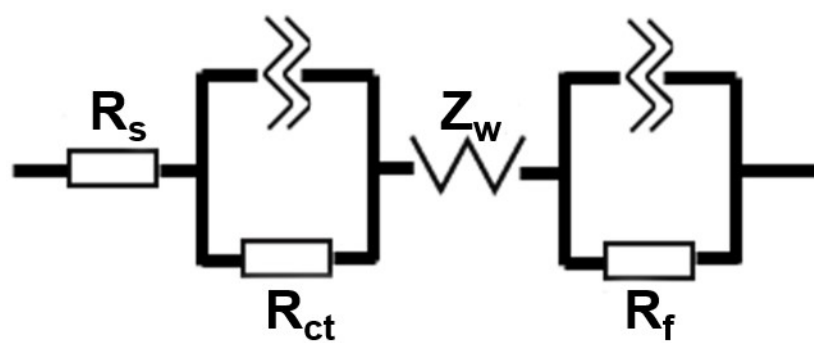

**Fig. S4** Equivalent circuit model for Nyquist plots in Fig. 4f.

**Table S1** Corresponding EIS fitted data for the ZMO TiT NFs and ZMO NTs

| Electrode   | $R_s$ (ohm) | $R_{ct}$ (ohm) | $R_f$ (ohm) |
|-------------|-------------|----------------|-------------|
| ZMO TiT NFs | 1.3         | 151.7          | 4.1         |
| ZMO NTs     | 1.6         | 204.6          | 6.2         |

**Table S2** Comparison in cycling performance of the ZMO TiT NFs with other ZMO-based anodes

| Sample                                                                  | Current density (mA g <sup>-1</sup> ) | Cycle number              | Reversible capacity (mAh g <sup>-1</sup> ) | Ref.             |
|-------------------------------------------------------------------------|---------------------------------------|---------------------------|--------------------------------------------|------------------|
| ZMO TiT NFs                                                             | <b>500</b><br><b>2000</b>             | <b>200</b><br><b>1000</b> | <b>938.9</b><br><b>564.6</b>               | <b>This work</b> |
| ZnMn <sub>2</sub> O <sub>4</sub> microtubules                           | 200<br>500                            | 300<br>300                | 750.4<br>535.3                             | S1               |
| Nano-ZnMn <sub>2</sub> O <sub>4</sub>                                   | 100<br>1000                           | 90<br>1200                | 716<br>500                                 | S2               |
| Yolk-shell MnO@ZnMn <sub>2</sub> O <sub>4</sub> /N-C nanorods           | 1000                                  | 200                       | 595                                        | S3               |
| ZnMn <sub>2</sub> O <sub>4</sub> micro-belts                            | 500<br>1000                           | 150<br>350                | 731<br>372                                 | S4               |
| ZnMn <sub>2</sub> O <sub>4</sub> nano-peanuts                           | 2000                                  | 200                       | 516                                        | S5               |
| MWCNT/ZnMn <sub>2</sub> O <sub>4</sub>                                  | 1600                                  | 1000                      | 527                                        | S6               |
| Porous ZnMn <sub>2</sub> O <sub>4</sub> /biocarbon microsphere          | 500<br>1000                           | 150<br>650                | 820<br>550                                 | S7               |
| Core-shell ZnMn <sub>2</sub> O <sub>4</sub> nanosheets@carbon nanotubes | 50<br>1000                            | 100<br>200                | 803<br>595                                 | S8               |
| Loaf-like ZnMn <sub>2</sub> O <sub>4</sub>                              | 500                                   | 100                       | 517                                        | S9               |
| ZnMn <sub>2</sub> O <sub>4</sub> hollow microspheres                    | 400                                   | 100                       | 607                                        | S10              |
| ZnMn <sub>2</sub> O <sub>4</sub> microspheres                           | 100                                   | 100                       | 602                                        | S11              |
| ZnMn <sub>2</sub> O <sub>4</sub> /AC                                    | 100                                   | 50                        | 714                                        | S12              |
| ZnMn <sub>2</sub> O <sub>4</sub> nanoparticles                          | 200                                   | 160                       | 745                                        | S13              |
| ZnMn <sub>2</sub> O <sub>4</sub> /N-doped graphene                      | 500                                   | 200                       | 747                                        | S14              |

## References

- S1 X. Luo, X. Zhang, L. Chen, L. Li, G. Zhu, G. Chen, D. Yan, H. Xu and A. Yu, *ACS Appl. Mater. Interfaces*, 2018, **10**, 33170-33178.
- S2 T. Zhang, Y. Gao, H. Yue, H. Qiu, Z. Guo, Y. Wei, C. Wang, G. Chen and D. Zhang, *Electrochim. Acta*, 2016, **198**, 84-90.
- S3 M. Zhong, D. Yang, C. Xie, Z. Zhang, Z. Zhou and X.-H. Bu, *Small*, 2016, **12**, 5564-5571.
- S4 S. Zhu, Q. Chen, C. Yang, Y. Zhang, L. Hou, G. Pang, X. He, X. Zhang and C. Yuan, *Int. J. Hydrog. Energy*, 2017, **42**, 14154-14165.
- S5 J. Zou, B. Liu, H. Liu, Y. Ding, T. Xin and Y. Wang, *Mater. Res. Bull.*, 2018, **107**, 468-476.
- S6 W. Yao, J. Xu, J. Wang, J. Luo, Q. Shi and Q. Zhang, *ACS Sustain. Chem. Eng.*, 2015, **3**, 2170-2177.
- S7 J. Chen, W. Liu, S. Liu, H. Wang, Y. Zhang and S. Chen, *Chem. Eng. J.*, 2017, **308**, 1200-1208.
- S8 C. Yuan, L. Zhang, S. Zhu, H. Cao, J. Lin and L. Hou, *Nanotechnology*, 2015, **26**, 145401.
- S9 Z. Bai, N. Fan, C. Sun, Z. Ju, C. Guo, J. Yang and Y. Qian, *Nanoscale*, 2013, **5**, 2442-2447.
- S10 L. Zhou, H. B. Wu, T. Zhu and X. W. Lou, *J. Mater. Chem.*, 2012, **22**, 827-829.
- S11 W. Dang, F. Wang, Y. Ding, C. Feng and Z. Guo, *J. Alloys Compd.*, 2017, **690**, 72-79.



- S12 L. Yin, Z. Zhang, Z. Li, F. Hao, Q. Li, C. Wang, R. Fan and Y. Qi, *Adv. Funct. Mater.*, 2014, **24**, 4176-4185.
- S13 C. Feng, W. Wang, X. Chen, S. Wang and Z. Guo, *Electrochim. Acta*, 2015, **178**, 847-855.
- S14 D. Wang, W. Zhou, Y. Zhang, Y. Wang, G. Wu, K. Yu and G. Wen, *Nanotechnology*, 2016, **27**, 045405.
